# Supplementary material
Source: publisher site journal article supplement (https://www.spandidos-publications.com/2526/downloadSupplementary)

Figure S1. Correlation between PGC1 $\alpha$  and TFAM scores. y-axis, TFAM scores 3-9; x-axis, PGC1 $\alpha$  scores 2-9. Numbers next to each dot indicate the number of observations represented in the dot. PGC1 $\alpha$ , peroxisome proliferator-activated receptor  $\gamma$  coactivator 1; TFAM, transcription factor A mitochondrial.

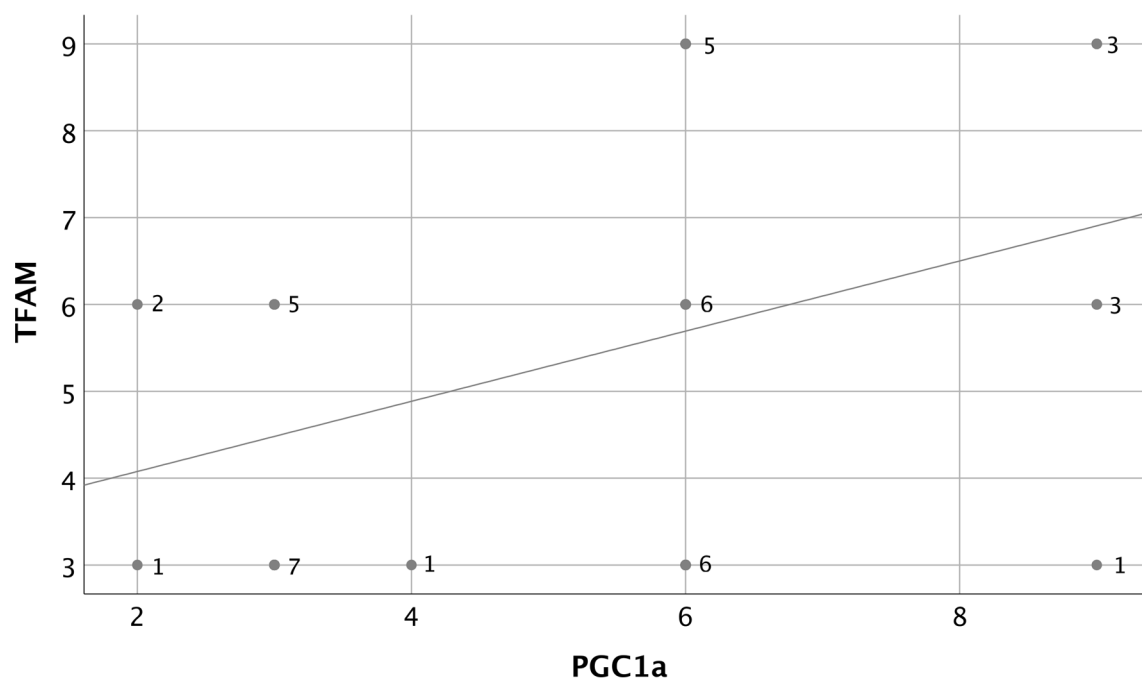

Figure S2. Correlation between PGC1 $\alpha$  and VDAC scores. y-axis, VDAC scores 2-9; x-axis, PGC1 $\alpha$  scores 0-10. Numbers next to each dot indicate the number of observations represented in the dot. PGC1 $\alpha$ , peroxisome proliferator-activated receptor  $\gamma$  coactivator 1; VDAC1, voltage-dependent anion channel type 1.

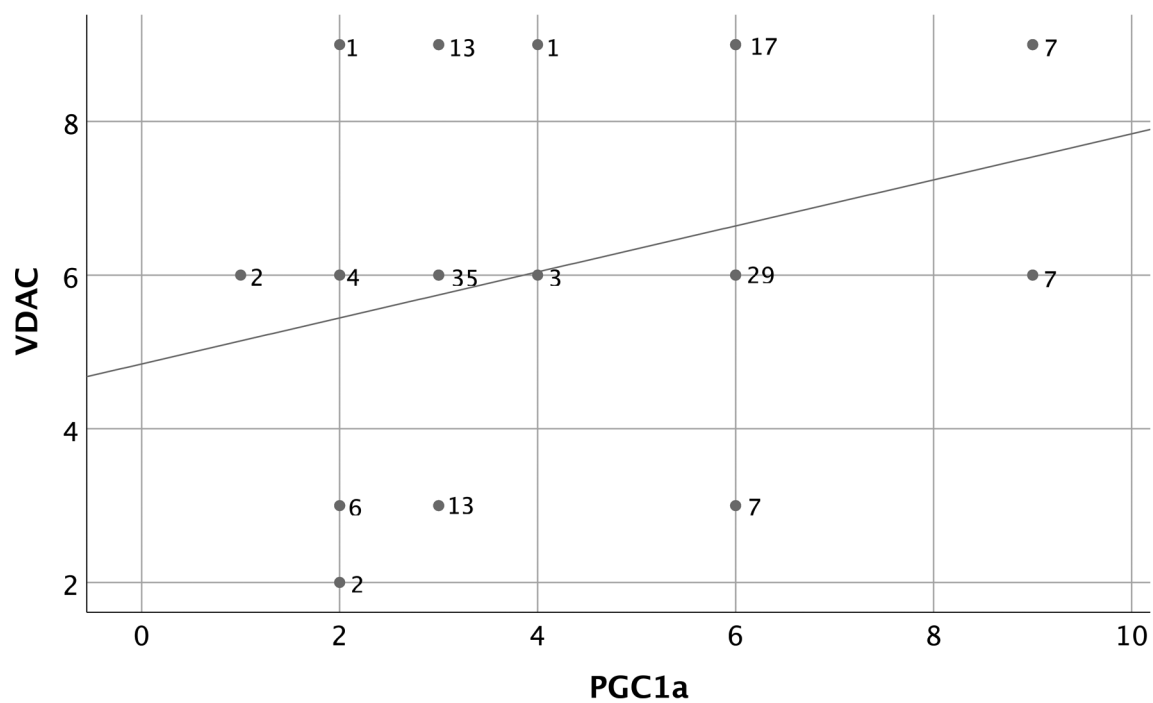

Figure S3. Survival analysis for three levels of VDAC expression in tumour tissue. Blue: Low expression; immunohistochemistry score 3. Red: Intermediate expression; immunohistochemistry score 6. Green: High expression; immunohistochemistry score 9.

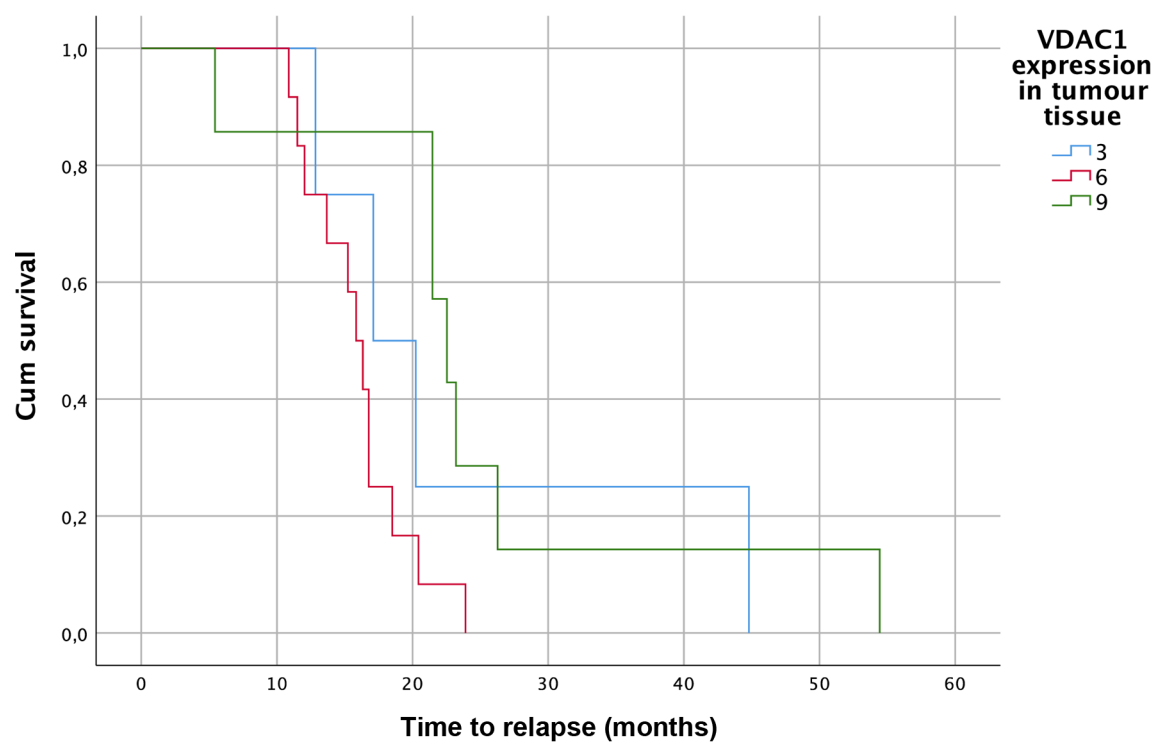

Supplement: Supplementary file 1 [file downloadSupplementary]
